# Supplementary material for: Noble metal-free bimetallic phosphide-decorated Zn0.5Cd0.5S with efficient photocatalytic H2 evolution
Source: Royal Society of Chemistry journal article supplement (doi:10.1039/d3dt03093h), 2023-01-01
Supplement: d3dt03093h1.pdf [file d3dt03093h1.pdf]

Noble metal free bimetallic phosphide decorated  $\text{Zn}_{0.5}\text{Cd}_{0.5}\text{S}$  with  
efficient photocatalytic  $\text{H}_2$  evolution

Lu Chen<sup>a\*</sup>, Feng Chen<sup>a</sup>, Yuzhou Xia<sup>a</sup>, Ruowen Liang<sup>a</sup>, Renkun Huang<sup>a\*</sup>, Guiyang  
Yana, Shaoming Ying<sup>a\*</sup>

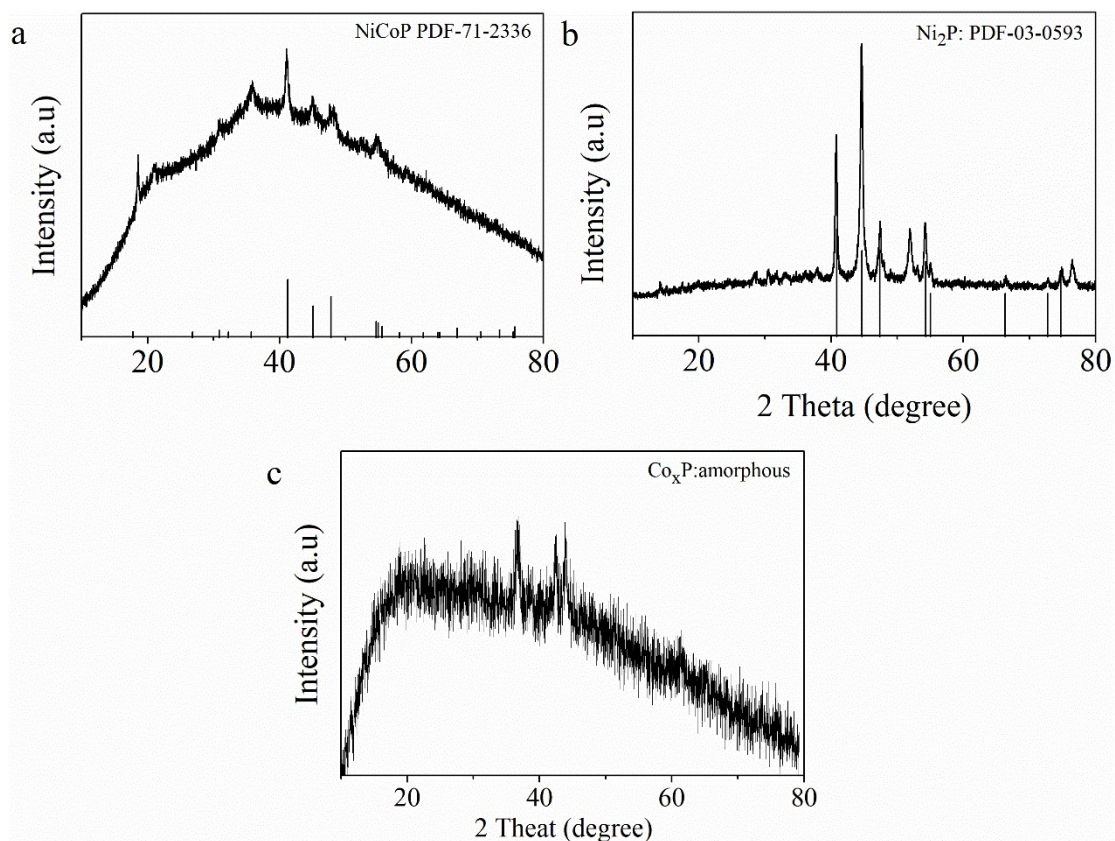

Fig. S1 XRD patterns of NiCoP, Ni<sub>2</sub>P and Co<sub>x</sub>P.

As shown in Fig. S1 (a, b), the XRD patterns of the NiCoP and Ni<sub>2</sub>P nanoparticles exhibit several characteristic diffractions that could be indexed to the of NiCoP and Ni<sub>2</sub>P (PDF# 71-2336 and PDF# 03-0953). As depicted in Fig. S1 (c), the amorphous Co<sub>x</sub>P was prepared by the same synthesis method.

Table. 1 element amount of 7% NiCoP/Zn<sub>0.5</sub>Cd<sub>0.5</sub>S

| Element | Element content (%) | Element | Element content (%) |
|---------|---------------------|---------|---------------------|
| Ni      | 1.88                | Zn      | 21.32               |
| Co      | 1.48                | Cd      | 20.38               |
| P       | 1.66                | S       | 38.77               |

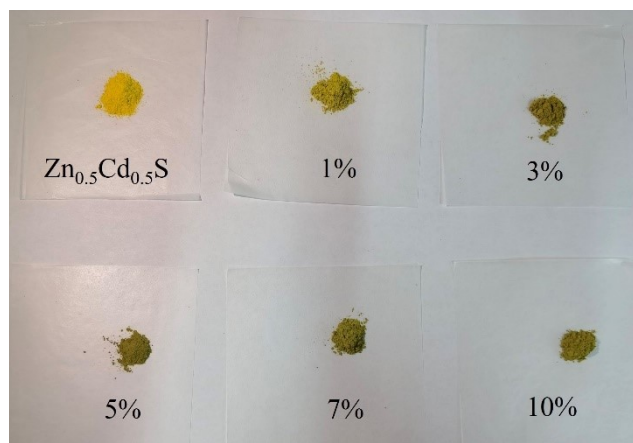

Fig. S2 Digital photographs of the as-prepared samples with different NiCoP loading content

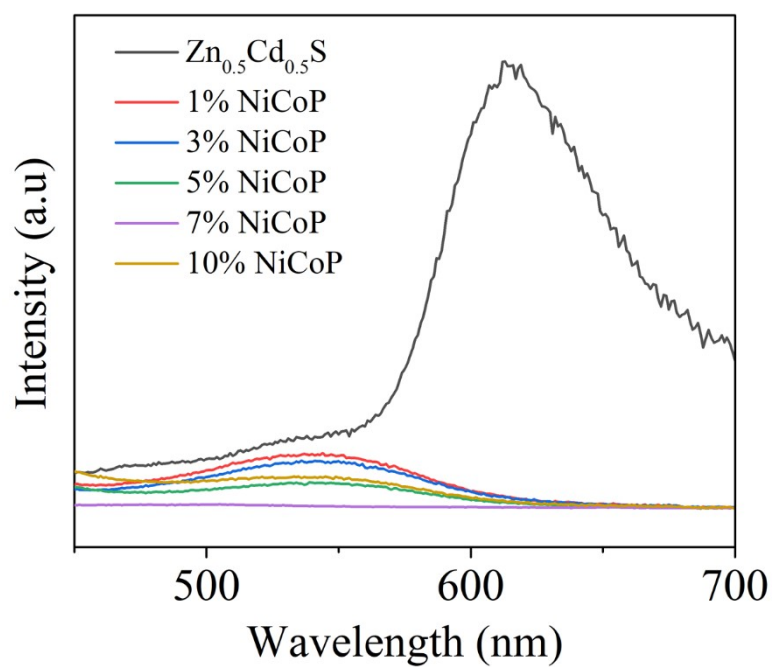

Fig. S3 photoluminescence spectra of Zn<sub>0.5</sub>Cd<sub>0.5</sub>S and x wt% NiCoP/Zn<sub>0.5</sub>Cd<sub>0.5</sub>S

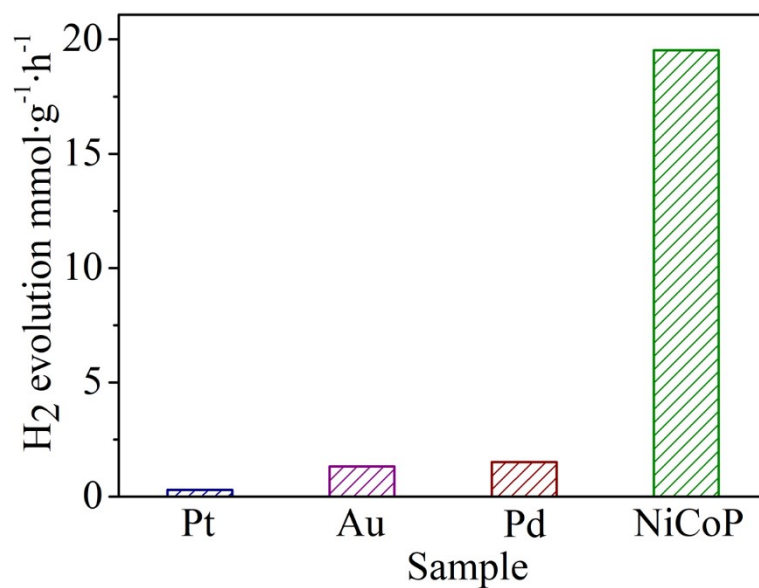

Fig. S4 Photocatalytic H<sub>2</sub> evolution rate of Zn<sub>0.5</sub>Cd<sub>0.5</sub>S modified with different cocatalyst.

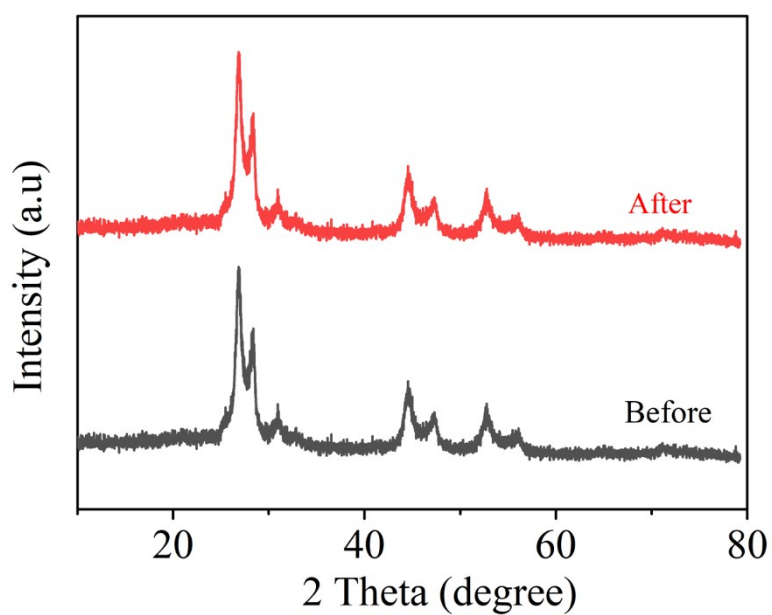

Fig. S5 XRD patterns of 7% NiCoP /Zn<sub>0.5</sub>Cd<sub>0.5</sub>S sample before and after H<sub>2</sub> evolution testing.
